# Supplementary material for: High performance nano-sized LiMn1−xFexPO4cathode materials for advanced lithium-ion batteries
Source: Royal Society of Chemistry journal article supplement (doi:10.1039/c7ra08993g), 2017-01-01
Supplement: c7ra08993g1.pdf [file c7ra08993g1.pdf]

## Supporting Information

### High performance nano-sized $\text{LiMn}_{1-x}\text{Fe}_x\text{PO}_4$ cathode material for advanced lithium-ion batteries

Zhihong Lei<sup>a</sup>, Ahmad Naveed<sup>a</sup>, Jingyu Lei<sup>a</sup>, Jiulin Wang<sup>\*a</sup>, Jun Yang<sup>a</sup>, Yanna Nuli<sup>a</sup>,  
Xiangchen Meng<sup>b</sup>, Yunliang Zhao<sup>b</sup>

<sup>a</sup> Shanghai Electrochemical Energy Devices Research Center, Department of  
Chemical Engineering, Shanghai Jiao Tong University, Shanghai 200240, P. R.  
China.

<sup>b</sup> Song Yuan Power Supply Company, Jilin Electric Power Co. LTD. Jilin 138000, PR  
China.

\*Corresponding author. Tel.: +86 21 54745887.

E-mail address: wangjiulin@sjtu.edu.cn

Table S1 Refined cell parameters of  $\text{LiMn}_{1-x}\text{Fe}_x\text{PO}_4/\text{C}$  ( $0 \leq x \leq 1$ ) materials

| Iron proportion | a(Å)    | b(Å)     | c(Å)    | Volume (Å <sup>3</sup> ) | Carbon content (%) |
|-----------------|---------|----------|---------|--------------------------|--------------------|
| x = 0           | 6.10553 | 10.45085 | 4.74697 | 302.89                   | 5.34               |
| x = 0.05        | 6.10227 | 10.45149 | 4.74786 | 302.81                   | 5.64               |
| x = 0.10        | 6.09713 | 10.43212 | 4.74042 | 301.52                   | 5.50               |
| x = 0.15        | 6.08934 | 10.43192 | 4.73890 | 301.03                   | 6.48               |
| x = 0.20        | 6.09331 | 10.43535 | 4.74054 | 301.43                   | 6.08               |
| x = 0.25        | 6.08084 | 10.43030 | 4.74531 | 300.97                   | 5.86               |
| x = 0.30        | 6.07246 | 10.41302 | 4.73188 | 299.12                   | 7.35               |
| x = 0.40        | 6.06129 | 10.40572 | 4.72702 | 298.14                   | 6.55               |
| x = 0.50        | 6.05326 | 10.39118 | 4.71638 | 296.66                   | 6.68               |
| x = 1           | 5.99712 | 10.32512 | 4.69412 | 290.66                   | 6.04               |

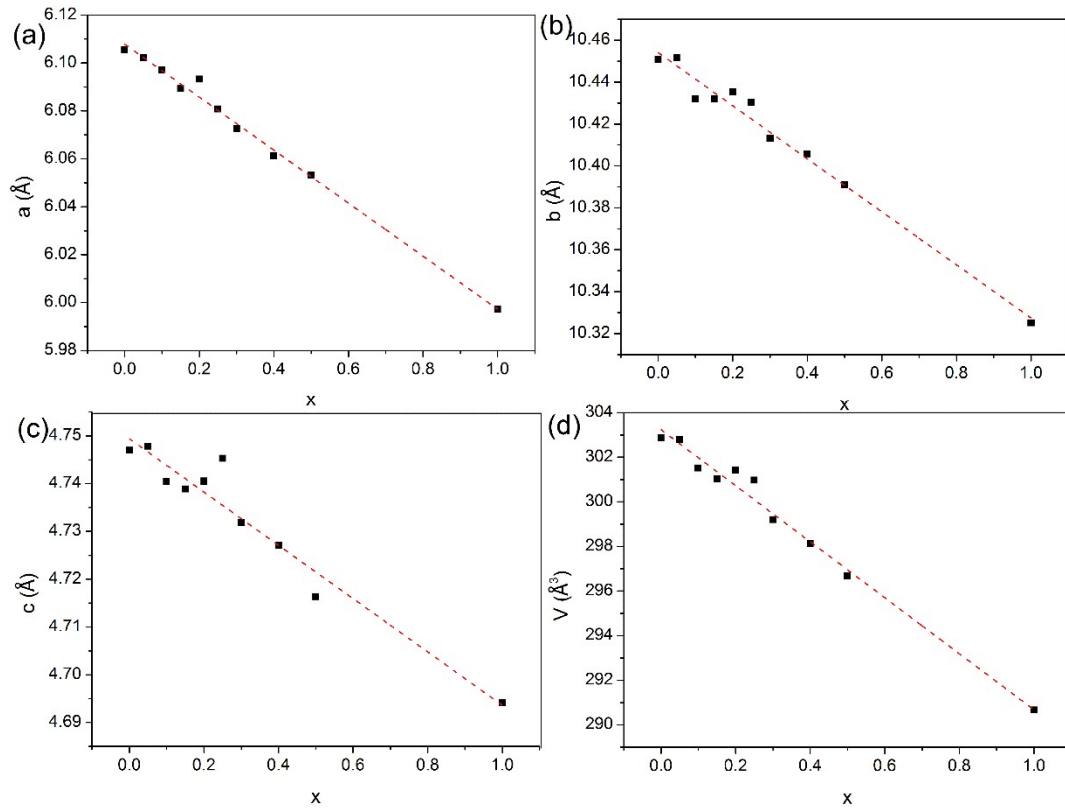

Figure S1. The crystal lattice parameters comparison of  $\text{LiMn}_{1-x}\text{Fe}_x\text{PO}_4/\text{C}$  ( $0 \leq x \leq 1$ ) materials.

Table S2. Atomic position of  $\text{LiMn}_{0.7}\text{Mn}_{0.3}\text{PO}_4$  determined by Rietveld structure refinement.

| Label | x        | y       | z       | Symmetry multiplicity |
|-------|----------|---------|---------|-----------------------|
| Li    | 0        | 0       | 0       | 4                     |
| Mn    | 0.28243  | 0.25    | 0.97211 | 4                     |
| Fe    | 0.27907  | 0.25    | 0.96776 | 4                     |
| P     | 0.09389  | 0.25    | 0.41314 | 4                     |
| O1    | 0.095852 | 0.25    | 0.73001 | 4                     |
| O2    | 0.45568  | 0.25    | 0.21398 | 4                     |
| O3    | 0.16138  | 0.05160 | 0.27820 | 8                     |

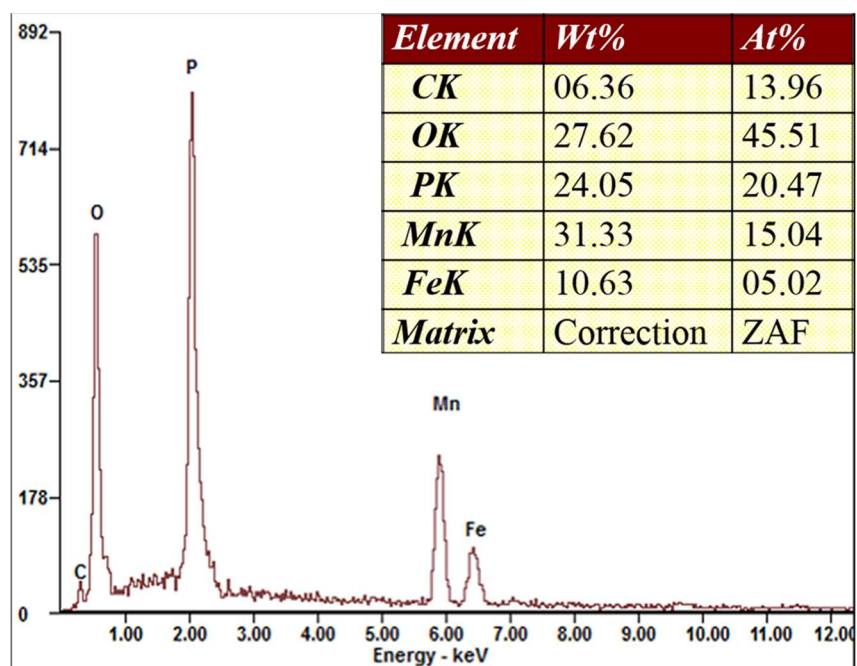

Figure S2. The SEM-EDX spectrum of  $\text{LiMn}_{0.75}\text{Fe}_{0.25}\text{PO}_4/\text{C}$  material.

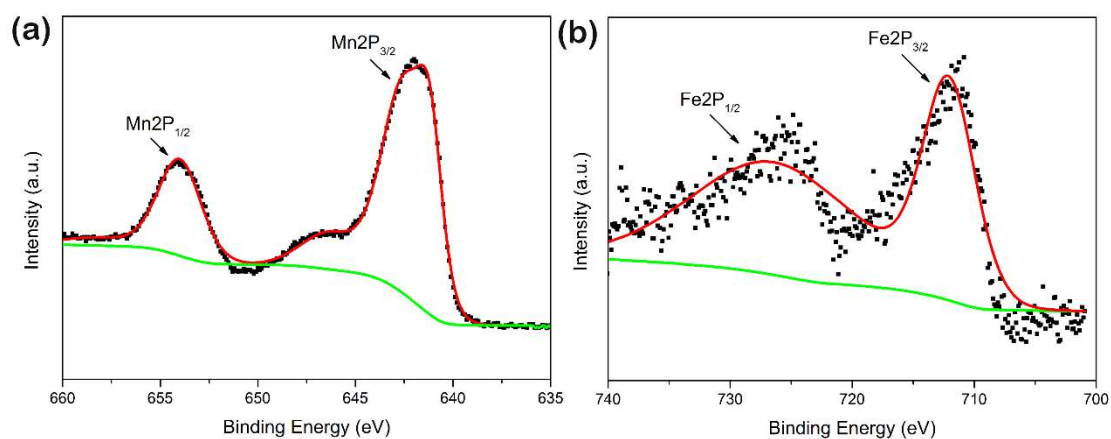

Figure S3. XPS spectra of Mn and Fe element in  $\text{LiMn}_{0.7}\text{Fe}_{0.3}\text{PO}_4/\text{C}$  material.

Table S3 Electronic conductivities of Selected  $\text{LiMn}_{1-x}\text{Fe}_x\text{PO}_4/\text{C}$  materials

| Material                                                 | Conductivity ( $\text{S cm}^{-1}$ ) |
|----------------------------------------------------------|-------------------------------------|
| $\text{LiMn}_{0.7}\text{Fe}_{0.3}\text{PO}_4/\text{C}$   | $5.8 \times 10^{-5}$                |
| $\text{LiMn}_{0.75}\text{Fe}_{0.25}\text{PO}_4/\text{C}$ | $3.1 \times 10^{-5}$                |
| $\text{LiMnPO}_4/\text{C}$                               | $2.3 \times 10^{-5}$                |
| $\text{LiFePO}_4/\text{C}$                               | $6.8 \times 10^{-5}$                |
